# Supplementary material for: Vitrimerization: A Novel Concept to Reprocess and Recycle Thermoset Waste via Dynamic Chemistry
Source: PubMed Central journal article supplement (PMC6607417; doi:10.1002/gch2.201800076), 2019-04-07

# Global Challenges

---

Open Access

## Supporting Information

for *Global Challenges*, DOI: 10.1002/gch2.201800076

**Vitrimerization: A Novel Concept to Reprocess and Recycle  
Thermoset Waste via Dynamic Chemistry**

*Liang Yue, Vahab Solouki Bonab, Dian Yuan, Ammar Patel,  
Vahid Karimkhani, and Ica Manas-Zloczower\**

## Supporting Information

Table Sa) Mechanical properties comparing neat, vitrimer and vitrimerized samples for PU system

| Samples                              | Strength (MPa) | Modulus (MPa) | Elongation at break (%) |
|--------------------------------------|----------------|---------------|-------------------------|
| Neat                                 | 7.84±0.85      | 5.56±0.46     | 246.0±37.1              |
| Vitrimerized 1 <sup>st</sup> recycle | 2.35±0.22      | 2.43±0.06     | 192.0±16.9              |
| Vitrimer 1 wt%                       | 2.460±0.277    | 2.41±0.16     | 195±19                  |
| Vitrimer 5 wt%                       | 2.370±0.107    | 1.791±0.100   | 261±40                  |
| Vitrimer 10 wt%                      | 3.227±0.223    | 2.481±0.063   | 241±14                  |

Table Sb) Mechanical properties comparing neat, vitrimer and vitrimerized samples for epoxy system

| Samples                              | Strength (MPa) | Modulus (MPa) | Elongation at break (%) |
|--------------------------------------|----------------|---------------|-------------------------|
| Neat                                 | 40.00±1.41     | 802.00±100.41 | 8.0±0.1                 |
| Vitrimerized 1 <sup>st</sup> recycle | 26.00          | 600           | 6.8                     |
| Vitrimer 5wt%                        | 22.13±5.20     | 918.00±11.16  | 3.80±0.03               |

Table Sc) Mechanical properties of a PU system with multiple recycling and addition of nanofillers

| Samples                     | Strength (MPa) | Modulus (MPa) | Elongation at break (%) |
|-----------------------------|----------------|---------------|-------------------------|
| Neat                        | 7.84±0.84      | 5.55±0.45     | 246.0±37.1              |
| Recycled (1 <sup>st</sup> ) | 2.35±0.22      | 2.43±0.06     | 192.0±16.9              |
| Recycled (2 <sup>nd</sup> ) | 2.10±0.22      | 1.22±0.22     | 259±52                  |
| Recycled 10 wt.% CNS        | 7.251±1.532    | 13.48±2.88    | 67.5±28.6               |

Figure S1: Effect of multiple recycling on the thermal properties of epoxy system

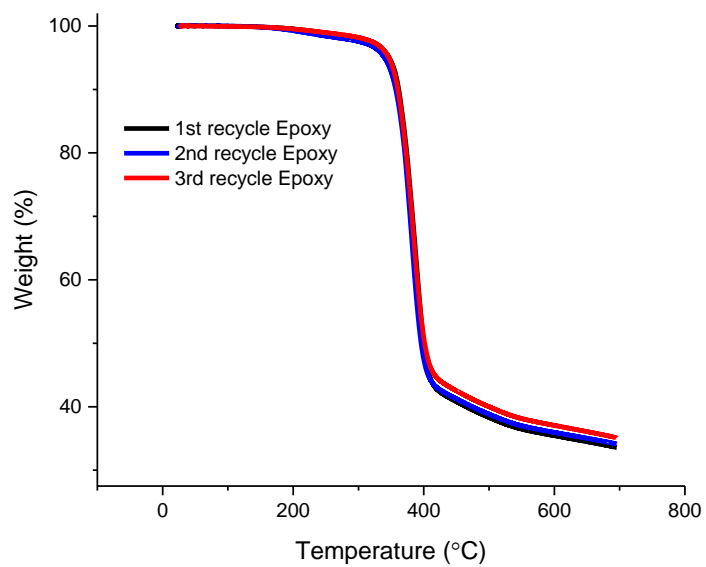

Supplement: GCH2-3-1800076-s001.pdf [file GCH2-3-1800076-s001.pdf]
